# Supplementary material for: A new approach to simulate aerosol effects on cirrus clouds in EMAC v2.54
Source: Copernicus journal article supplement (doi:10.5194/gmd-2019-212), 2019-09-03
Supplement: Supplementary file 1 [file gmd-2019-212-supplement.pdf]

# Supplement to: A new approach to simulate aerosol effects on cirrus clouds in EMAC v2.54

Mattia Righi<sup>1</sup>, Johannes Hendricks<sup>1</sup>, Ulrike Lohmann<sup>2</sup>, Christof Gerhard Beer<sup>1</sup>, Valerian Hahn<sup>1</sup>, Bernd Heinold<sup>3</sup>, Romy Heller<sup>1</sup>, Martina Krämer<sup>4</sup>, Christian Rolf<sup>4</sup>, Ina Tegen<sup>3</sup>, and Christiane Voigt<sup>1</sup>

<sup>1</sup>Deutsches Zentrum für Luft- und Raumfahrt (DLR), Institut für Physik der Atmosphäre, Oberpfaffenhofen, Germany

<sup>2</sup>Institute for Atmospheric and Climate Science, ETH Zürich, Zürich, Switzerland

<sup>3</sup>Leibniz Institute for Tropospheric Research (TROPOS), Leipzig, Germany

<sup>4</sup>Research Centre Jülich, Institute for Energy and Climate Research 7: Stratosphere (IEK-7), Jülich, Germany

Correspondence to: Mattia Righi (mattia.righi@dlr.de)

In this Supplement additional figures are shown, which complement the evaluation of EMAC-MADE3 presented in Sect. 4 of the paper. For details about each figure, see the corresponding sections in the paper as mentioned in the figure captions.

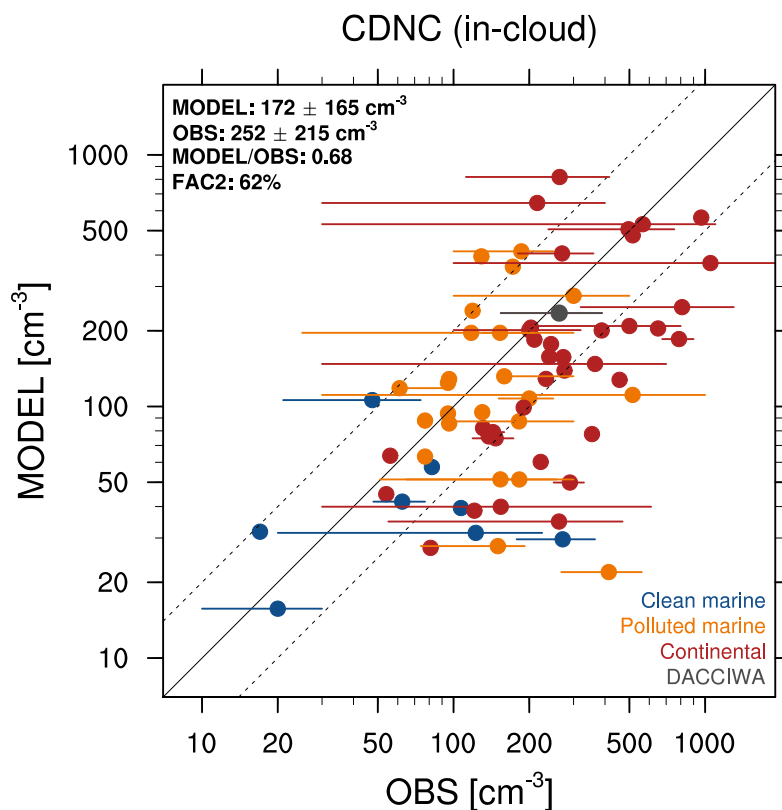

**Figure S1.** As in Fig. 3 in the paper, but using a different method for calculating supersaturation in liquid clouds. See Sect. 4.3 in the paper for details.

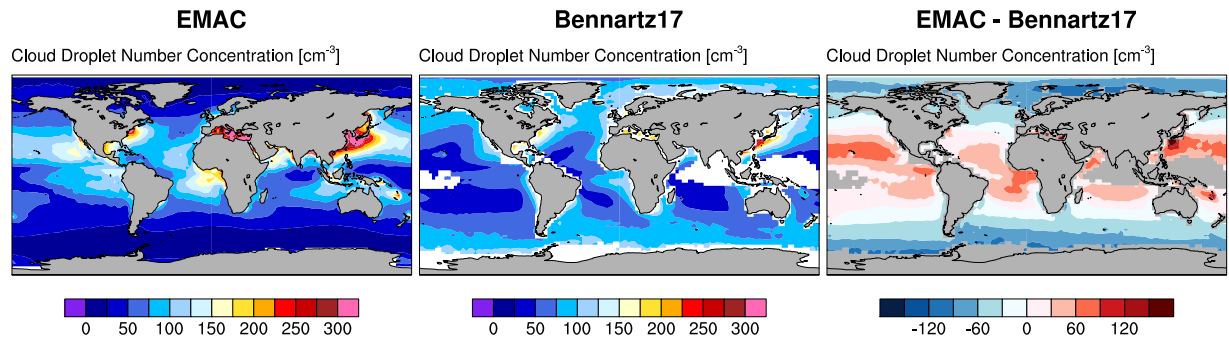

**Figure S2.** As in Fig. 4 in the paper, but using a different method for calculating supersaturation in liquid clouds. See Sect. 4.3 in the paper for details.
